# Supplementary material for: Metal Organic Framework-Incorporated Three-Dimensional (3D) Bio-Printable Hydrogels to Facilitate Bone Repair: Preparation and In Vitro Bioactivity Analysis
Source: Gels. 2023 Nov 23;9(12):923. doi: 10.3390/gels9120923 (PMC10742699; doi:10.3390/gels9120923)

## Supporting Information

### **Metal Organic Framework-Incorporated Three-Dimensional (3D) Bio-printable Hydrogels to Facilitate Bone Repair: Preparation and In Vitro Bioactivity Analysis**

Cho-E Choi <sup>1</sup>, Aishik Chakraborty <sup>1,2</sup>, Hailey Adzija <sup>3</sup>, Yasmeen Shamiya <sup>3</sup>, Khaled Hijazi <sup>2,4</sup>,  
Ali Coyle <sup>4</sup>, Amin Rizkalla <sup>1,2,4,5,6</sup>, David Holdsworth <sup>5</sup>, and Arghya Paul <sup>1,2,3,4\*</sup>

<sup>1</sup> Department of Chemical and Biochemical Engineering, The University of Western Ontario, London, ON N6A 5B9, Canada

<sup>2</sup> Collaborative Specialization in Musculoskeletal Health Research and Bone and Joint Institute, The University of Western Ontario, London, ON N6A 5B9, Canada;

<sup>3</sup> Department of Chemistry, The University of Western Ontario, London, ON N6A 5B9, Canada

<sup>4</sup> School of Biomedical Engineering, The University of Western Ontario, London, ON N6A 5B9, Canada

<sup>5</sup> Department of Medical Biophysics, The University of Western Ontario, London, ON N6A 5B9, Canada

<sup>6</sup> Dentistry, The University of Western Ontario, London Ontario, London ON N5A 5B9, Canada

\* Correspondence: [arghya.paul@uwo.ca](mailto:arghya.paul@uwo.ca); Tel.: 519-661-2111

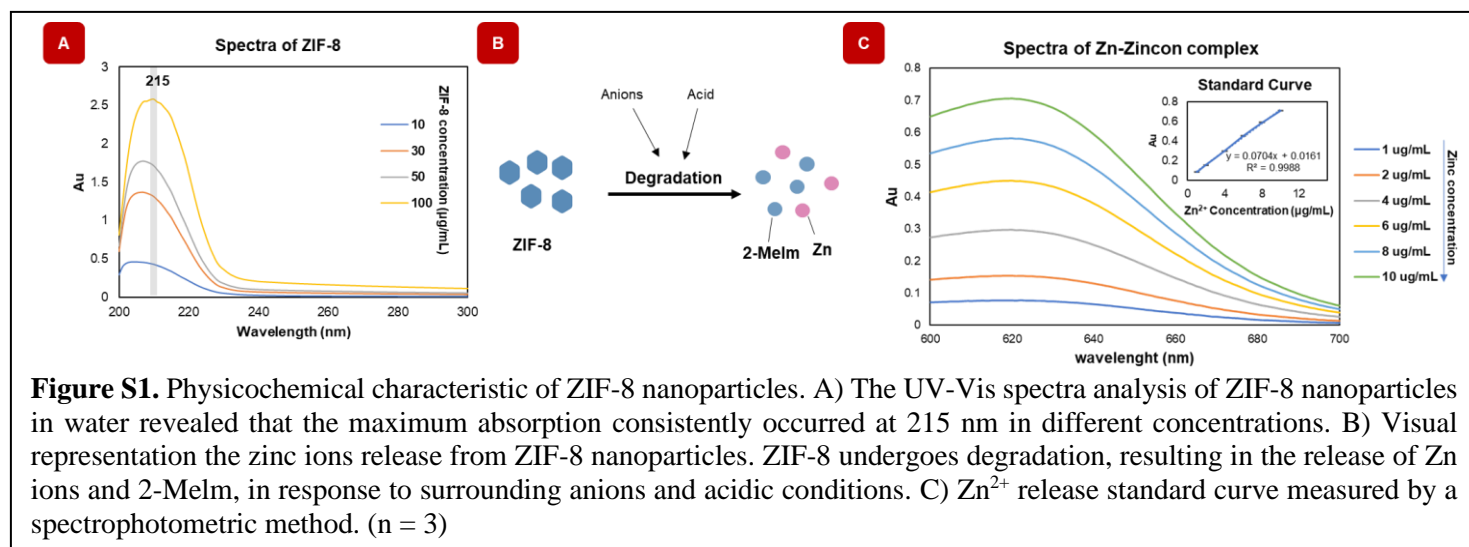

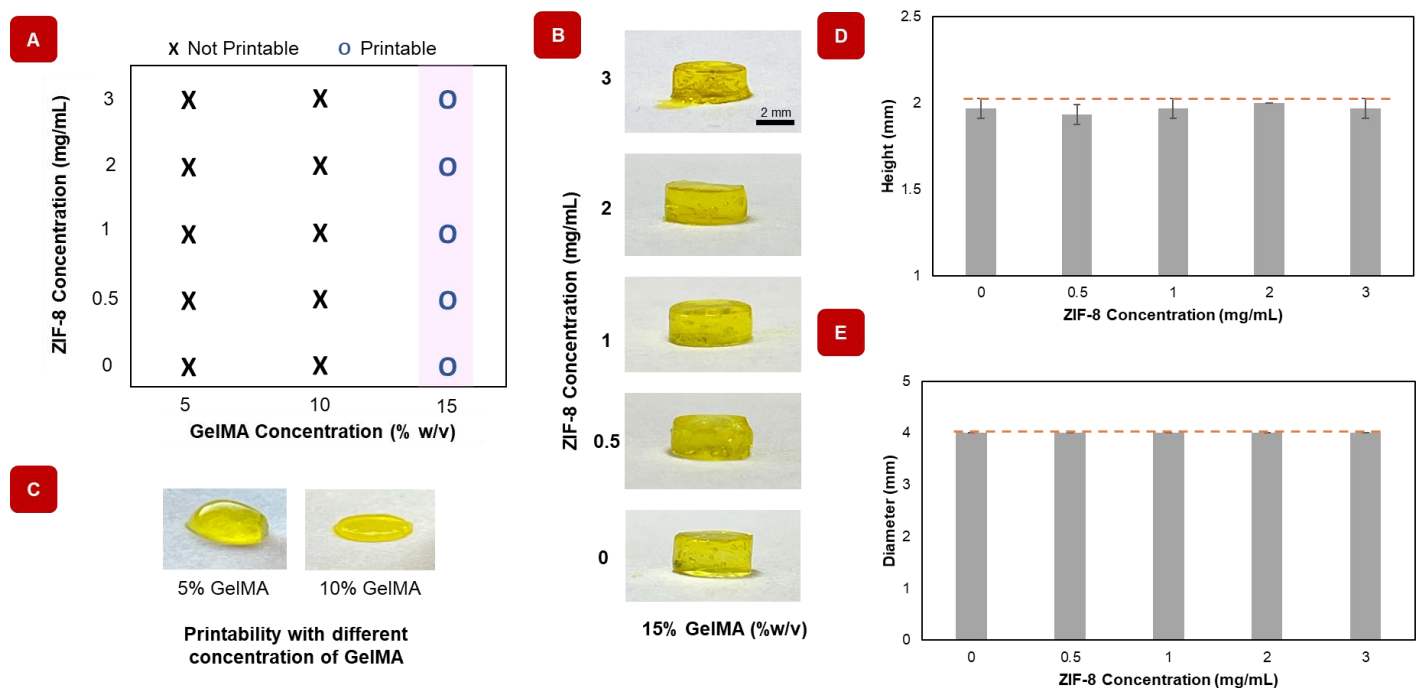

**Figure S2.** Optimizing biomaterial formulation via 3D printing. A) Printability of GelMA and GelMA/ZIF-8 nanocomposite hydrogels at varying compositions. B) Corresponding images of printable hydrogels. C) Images of unprintable hydrogels. Unprintable hydrogels were classified by their inability to retain their shape and meet the dimensions of the desired structure (4 mm diameter, 2 mm height). D) Corresponding images of printable hydrogels. D) Corresponding height of printable hydrogels (n = 3). E) Corresponding diameter of printable hydrogels (n = 3).

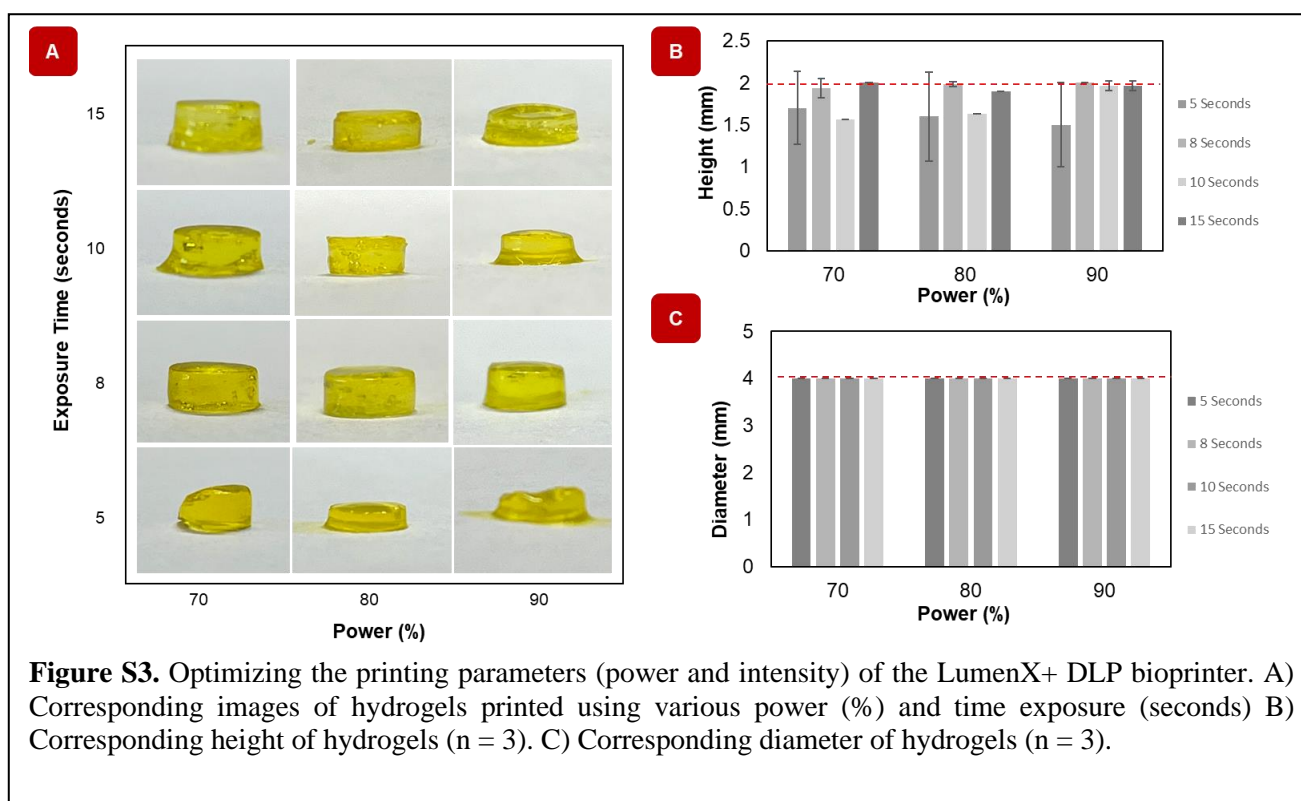

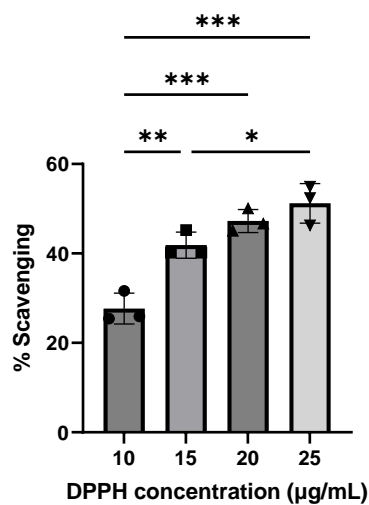

**Figure S4.** The incorporation of antioxidant agents into nanocomposite hydrogels significantly enhanced their antioxidant activity. A nanocomposite hydrogel was loaded with 10 µg/mL of ascorbic acid as an antioxidant agent ( $n = 3$ ). The antioxidant-loaded nanocomposite hydrogel demonstrated diverse scavenging activities in relation to different concentrations of DPPH. The results indicated that as the concentrations of the DPPH agents increased, the efficacy of %scavenging further improved, providing confirmation of antioxidant activity in the nanocomposite hydrogel. \* $p$ -value < 0.05, \*\* $p$ -value < 0.01, \*\*\* $p$ -value < 0.001, and \*\*\*\* $p$ -value < 0.0001.

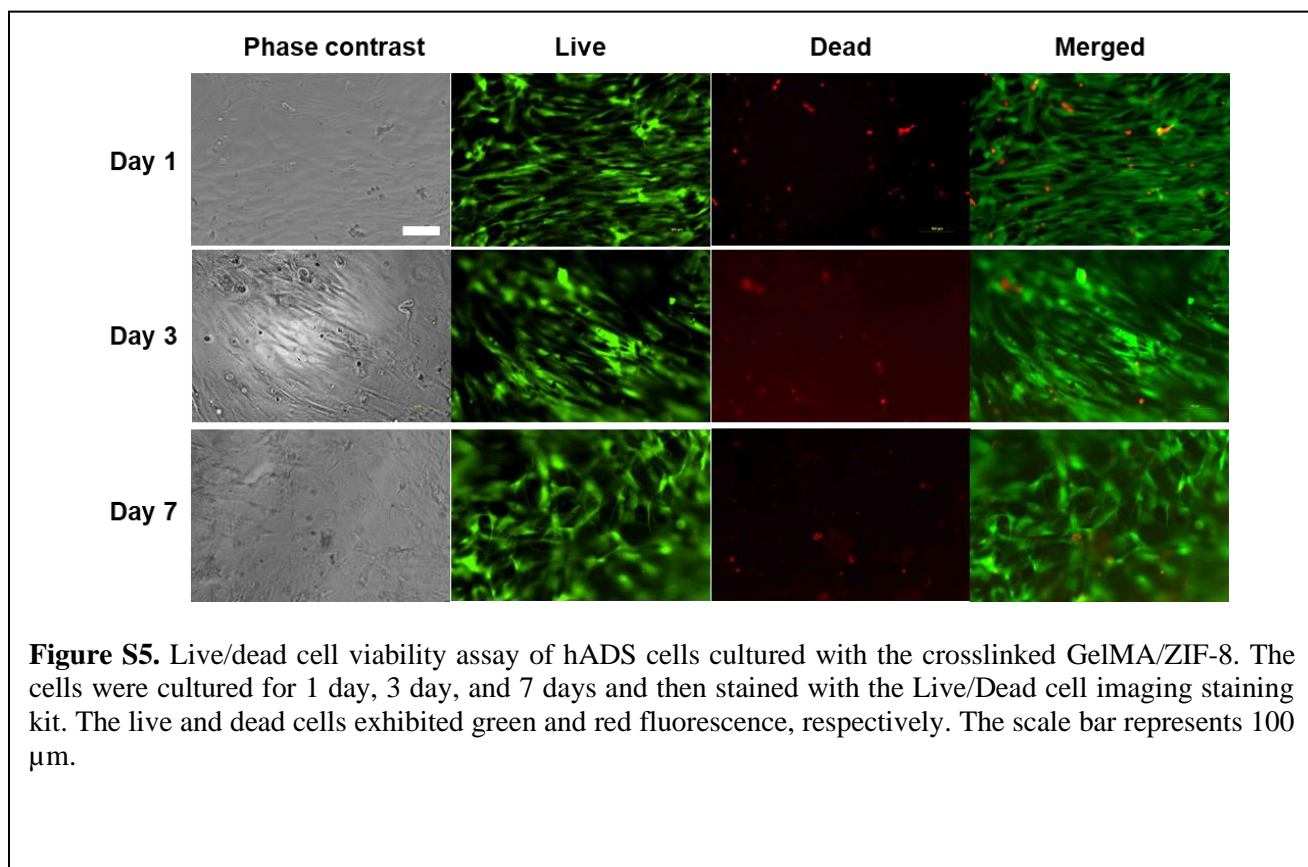

Supplement: Supplementary file 1 [file gels-09-00923-s001.zip › gels-2687498-supplementary.pdf]
